# Supplementary material for: Fe-substituted Na3.5V1.5Mn0.5(PO4)3 NaSICON cathode with multi-electron reactions and improved energy output
Source: Royal Society of Chemistry journal article supplement (doi:10.1039/d6ra00418k), 2026-04-24
Supplement: d6ra00418k1.pdf [file d6ra00418k1.pdf]

## Supporting Information for

### Fe-Substituted Na<sub>3.5</sub>V<sub>1.5</sub>Mn<sub>0.5</sub>(PO<sub>4</sub>)<sub>3</sub> NaSICON Cathode with Multi-Electron Reactions and Improved Energy Output

Loubna Chayal<sup>a</sup>, Soraia El Moutchou<sup>b</sup>, Noha Sabi<sup>b</sup>, Hicham Ben Youcef<sup>b</sup>, Hasna Aziam<sup>b,\*</sup>, Mohamed Saadi<sup>a</sup>, and Mohammed Hadouchi<sup>a,\*</sup>

<sup>a</sup>Laboratoire de Chimie Appliquée des Matériaux, Centre des Sciences des Matériaux, Faculty of Science, Mohammed V University in Rabat, Avenue Ibn Battouta, BP 1014, Rabat, Morocco

<sup>b</sup>High Throughput Multidisciplinary Research (HTMR), College of Chemical Sciences and Engineering (CCSE), Mohammed VI Polytechnic University (UM6P), Lot 660 Hay Moulay Rachid, Ben Guerir, 43150, Morocco

\*Corresponding authors:

Hasna Aziam: [Hasna.AZIAM@um6p.ma](mailto:Hasna.AZIAM@um6p.ma) and Mohammed Hadouchi : [m.hadouchi@um5r.ac.ma](mailto:m.hadouchi@um5r.ac.ma)

#### Note S1. Raman-based determination of lateral crystallite size (L<sub>a</sub>):

The lateral crystallite size (L<sub>a</sub>) was determined from the I<sub>D1</sub>/I<sub>G</sub> ratio using the Tuinstra-Koenig relation:

$$L_a = \frac{4.4}{\frac{I_{D1}}{I_G}} \times \left( \frac{2.41}{E_L} \right)^4 \quad (\text{S1})$$

where E<sub>L</sub> represent the laser energy, which is equal to 2.3308 eV for 532 nm.

#### Note S2. Theoretical Capacity:

The theoretical capacity (*C*<sub>theoretical</sub>) of Na<sub>3.5</sub>V<sub>1.5</sub>Mn<sub>0.25</sub>Fe<sub>0.25</sub>(PO<sub>4</sub>)<sub>3</sub> is calculated by the following formula:

$$C_{\text{theoretical}} = (n \times F) / (M \times 3.6)$$

Where F is the Faraday constant (96485 C/mol), M is the molecular weight of Na<sub>3.5</sub>V<sub>1.5</sub>Mn<sub>0.25</sub>Fe<sub>0.25</sub>(PO<sub>4</sub>)<sub>3</sub> (469.5 g/mol) and n is the number of electrons (assumed to be 2).

$$C_{\text{theoretical}} = (2 \times 96485) / (469.5 \times 3.6)$$

$$C_{theoretical} \sim 114.2 \text{ mAh g}^{-1}$$

### Note S3. Energy density:

Energy density = Average discharge voltage  $\times$  discharge capacity of the cathode material

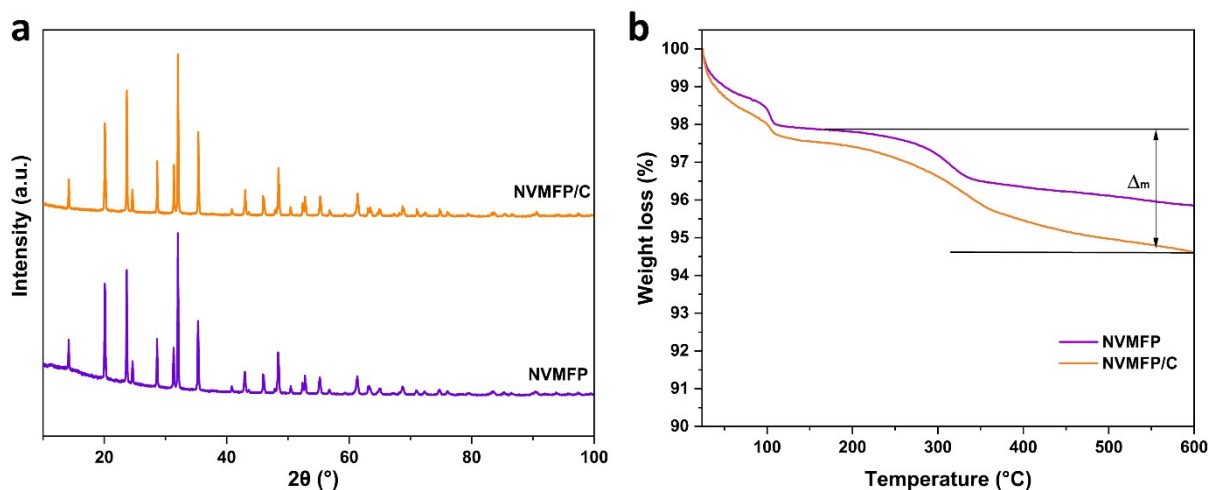

Fig. S1. (a) XRD patterns and (b) TG curves of NVMFP and of NVMFP/C powders.

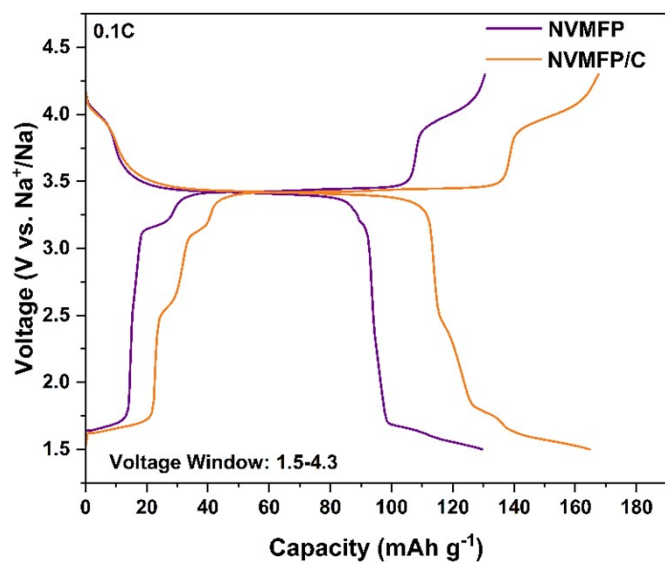

Fig. S2. Second charge-discharge profile of NVMFP and NVMFP/C cathodes at 0.1 C.

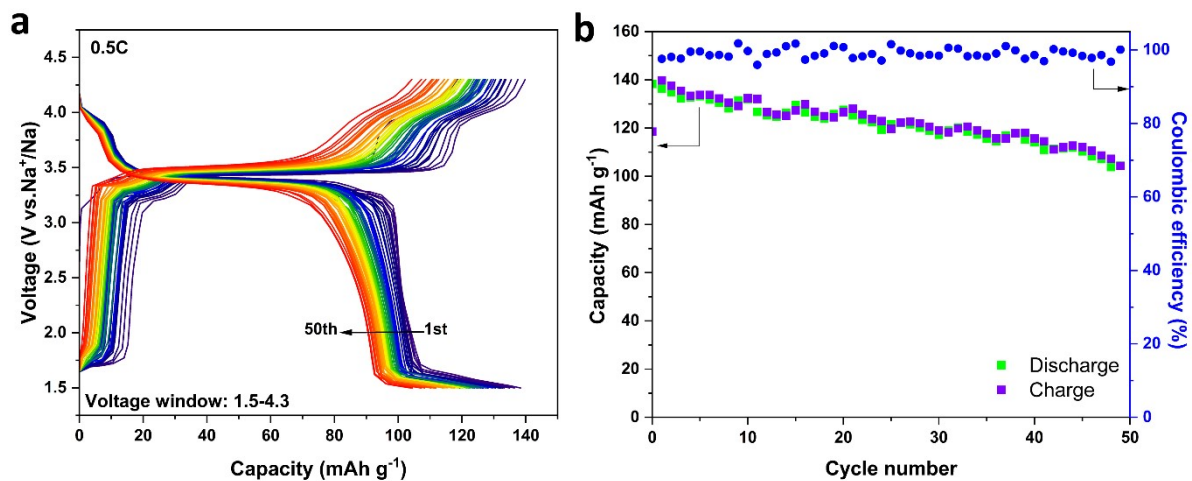

Fig. S3. Cycling performance of NVMFP/C at 0.5 C.

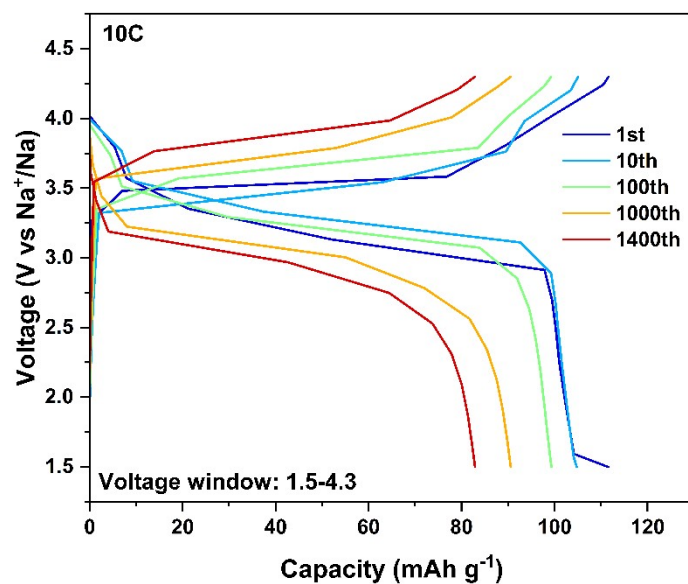

Fig. S4. Voltage profiles of NVMFP/C at 10 C for different cycle numbers.

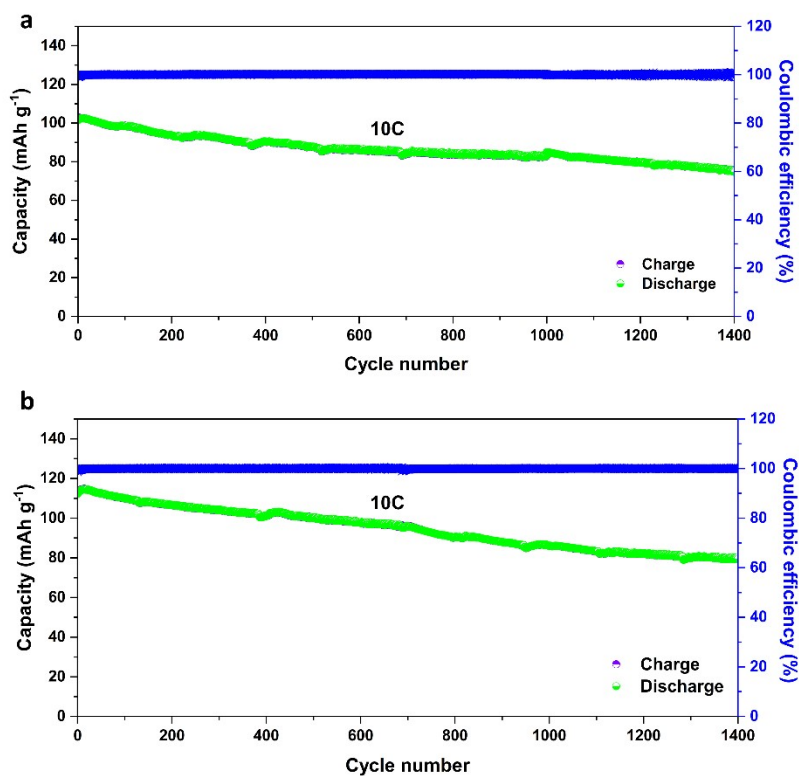

**Fig. S5.** Repeatability tests of NVMFP/C at 10 C.

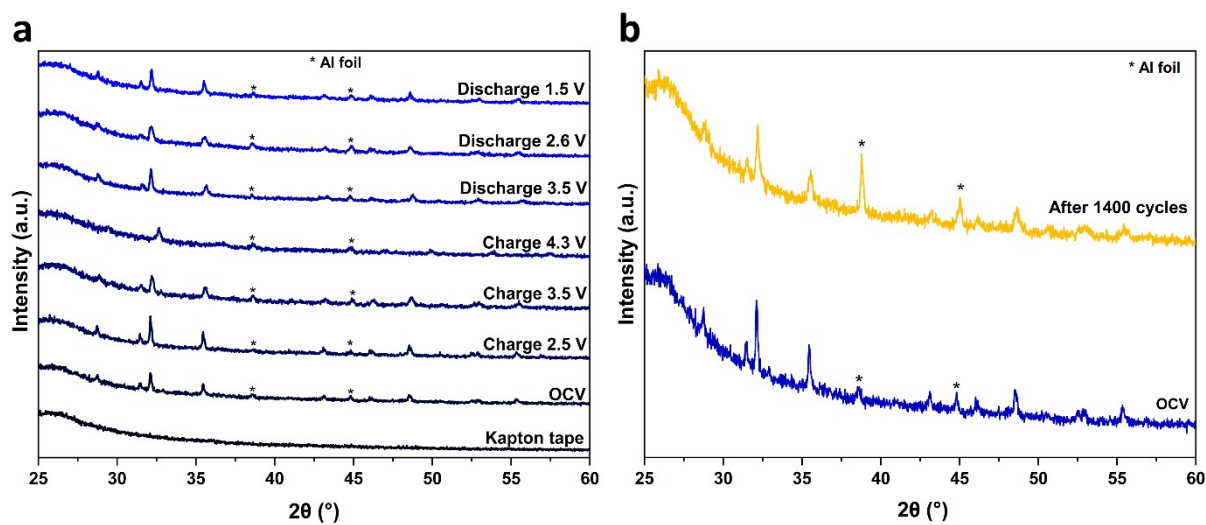

**Fig. S6.** Ex-situ XRD patterns of NVMFP/C (a) at different voltage stages during the first cycle at C/10 and (b) after 1400 cycles at 10 C.

**Table S1.** Elemental composition of Na, Mn, and Fe in the NVMFP/C sample determined by ICP-OES.

| ICP results | Na   | Mn   | Fe   |
|-------------|------|------|------|
|             | 3.42 | 0.26 | 0.26 |

**Table S2.** Geometric parameters (Å, °) for NVMFP/C.

| <b>Distances (Å)</b>                   |           |                                          |           |
|----------------------------------------|-----------|------------------------------------------|-----------|
| P1—O1 <sup>i</sup>                     | 1.539 (4) | V1—O2                                    | 2.005 (5) |
| P1—O1 <sup>ii</sup>                    | 1.539 (5) | V1—O2 <sup>v</sup>                       | 2.005 (4) |
| P1—O2 <sup>iii</sup>                   | 1.505 (5) | V1—O2 <sup>iii</sup>                     | 2.005 (6) |
| P1—O2 <sup>iv</sup>                    | 1.505 (5) | Na1—O1                                   | 2.517 (4) |
| Fe1—O1                                 | 2.031 (4) | Na1—O1 <sup>v</sup>                      | 2.517 (5) |
| Fe1—O1 <sup>v</sup>                    | 2.031 (5) | Na1—O1 <sup>iii</sup>                    | 2.517 (5) |
| Fe1—O1 <sup>iii</sup>                  | 2.031 (5) | Na1—O1 <sup>vi</sup>                     | 2.517 (4) |
| Fe1—O2                                 | 2.005 (5) | Na1—O1 <sup>vii</sup>                    | 2.517 (5) |
| Fe1—O2 <sup>v</sup>                    | 2.005 (4) | Na1—O1 <sup>viii</sup>                   | 2.517 (5) |
| Fe1—O2 <sup>iii</sup>                  | 2.005 (6) | Na2—O1 <sup>i</sup>                      | 2.488 (7) |
| Mn1—O1                                 | 2.031 (4) | Na2—O1 <sup>ix</sup>                     | 2.395 (4) |
| Mn1—O1 <sup>v</sup>                    | 2.031 (5) | Na2—O1 <sup>ii</sup>                     | 2.488 (6) |
| Mn1—O1 <sup>iii</sup>                  | 2.031 (5) | Na2—O1 <sup>x</sup>                      | 2.395 (5) |
| Mn1—O2                                 | 2.005 (5) | Na2—O2 <sup>xi</sup>                     | 3.217 (6) |
| Mn1—O2 <sup>v</sup>                    | 2.005 (4) | Na2—O2 <sup>xii</sup>                    | 2.857 (7) |
| Mn1—O2 <sup>iii</sup>                  | 2.005 (6) | Na2—O2 <sup>xiii</sup>                   | 3.217 (7) |
| V1—O1                                  | 2.031 (4) | Na2—O2 <sup>xiv</sup>                    | 2.857 (6) |
| V1—O1 <sup>v</sup>                     | 2.031 (5) | Na2—O2 <sup>i</sup>                      | 2.604 (4) |
| <b>Angles (°)</b>                      |           |                                          |           |
| O1 <sup>i</sup> —P1—O1 <sup>ii</sup>   | 110.1 (4) | O1 <sup>v</sup> —Mn1—O1 <sup>iii</sup>   | 85.6 (4)  |
| O1 <sup>i</sup> —P1—O2 <sup>iii</sup>  | 110.4 (4) | O1 <sup>v</sup> —Mn1—O2                  | 87.8 (3)  |
| O1 <sup>i</sup> —P1—O2 <sup>iv</sup>   | 106.5 (4) | O1 <sup>v</sup> —Mn1—O2 <sup>v</sup>     | 87.7 (3)  |
| O1 <sup>ii</sup> —P1—O2 <sup>iii</sup> | 106.5 (5) | O1 <sup>v</sup> —Mn1—O2 <sup>iii</sup>   | 171.0 (5) |
| O1 <sup>ii</sup> —P1—O2 <sup>iv</sup>  | 110.4 (6) | O1 <sup>iii</sup> —Mn1—O2                | 171.0 (4) |
| O2 <sup>iii</sup> —P1—O2 <sup>iv</sup> | 113.1 (4) | O1 <sup>iii</sup> —Mn1—O2 <sup>v</sup>   | 87.8 (3)  |
| O1—Fe1—O1 <sup>v</sup>                 | 85.6 (3)  | O1 <sup>iii</sup> —Mn1—O2 <sup>iii</sup> | 87.7 (3)  |
| O1—Fe1—O1 <sup>iii</sup>               | 85.6 (3)  | O2—Mn1—O2 <sup>v</sup>                   | 98.1 (3)  |
| O1—Fe1—O2                              | 87.7 (3)  | O2—Mn1—O2 <sup>iii</sup>                 | 98.1 (5)  |
| O1—Fe1—O2 <sup>v</sup>                 | 171.0 (4) | O2 <sup>v</sup> —Mn1—O2 <sup>iii</sup>   | 98.1 (4)  |
| O1—Fe1—O2 <sup>iii</sup>               | 87.8 (3)  | O1—V1—O1 <sup>v</sup>                    | 85.6 (3)  |
| O1 <sup>v</sup> —Fe1—O1 <sup>iii</sup> | 85.6 (4)  | O1—V1—O1 <sup>iii</sup>                  | 85.6 (3)  |
| O1 <sup>v</sup> —Fe1—O2                | 87.8 (3)  | O1—V1—O2                                 | 87.7 (3)  |
| O1 <sup>v</sup> —Fe1—O2 <sup>v</sup>   | 87.7 (3)  | O1—V1—O2 <sup>v</sup>                    | 171.0 (4) |
| O1 <sup>v</sup> —Fe1—O2 <sup>iii</sup> | 171.0 (5) | O1—V1—O2 <sup>iii</sup>                  | 87.8 (3)  |
| O1 <sup>iii</sup> —Fe1—O2              | 171.0 (4) | O1 <sup>v</sup> —V1—O1 <sup>iii</sup>    | 85.6 (4)  |

|                                          |           |                                         |           |
|------------------------------------------|-----------|-----------------------------------------|-----------|
| O1 <sup>iii</sup> —Fe1—O2 <sup>v</sup>   | 87.8 (3)  | O1 <sup>v</sup> —V1—O2                  | 87.8 (3)  |
| O1 <sup>iii</sup> —Fe1—O2 <sup>iii</sup> | 87.7 (3)  | O1 <sup>v</sup> —V1—O2 <sup>v</sup>     | 87.7 (3)  |
| O2—Fe1—O2 <sup>v</sup>                   | 98.1 (3)  | O1 <sup>v</sup> —V1—O2 <sup>iii</sup>   | 171.0 (5) |
| O2—Fe1—O2 <sup>iii</sup>                 | 98.1 (5)  | O1 <sup>iii</sup> —V1—O2                | 171.0 (4) |
| O2 <sup>v</sup> —Fe1—O2 <sup>iii</sup>   | 98.1 (4)  | O1 <sup>iii</sup> —V1—O2 <sup>v</sup>   | 87.8 (3)  |
| O1—Mn1—O1 <sup>v</sup>                   | 85.6 (3)  | O1 <sup>iii</sup> —V1—O2 <sup>iii</sup> | 87.7 (3)  |
| O1—Mn1—O1 <sup>iii</sup>                 | 85.6 (3)  | O2—V1—O2 <sup>v</sup>                   | 98.1 (3)  |
| O1—Mn1—O2                                | 87.7 (3)  | O2—V1—O2 <sup>iii</sup>                 | 98.1 (5)  |
| O1—Mn1—O2 <sup>v</sup>                   | 171.0 (4) | O2 <sup>v</sup> —V1—O2 <sup>iii</sup>   | 98.1 (4)  |
| O1—Mn1—O2 <sup>iii</sup>                 | 87.8 (3)  |                                         |           |

Symmetry codes: (i)  $-x+2/3, -y+1/3, -z+1/3$ ; (ii)  $-x+y+1/3, y-1/3, z+1/6$ ; (iii)  $-x+y, -x, z$ ; (iv)  $y, x, -z+1/2$ ; (v)  $-y, x-y, z$ ; (vi)  $-x, -y, -z$ ; (vii)  $y, -x+y, -z$ ; (viii)  $x-y, x, -z$ ; (ix)  $y+2/3, -x+y+1/3, -z+1/3$ ; (x)  $x+1/3, x-y-1/3, z+1/6$ ; (xi)  $x+1, y, z$ ; (xii)  $-y+1, x-y, z$ ; (xiii)  $x-y+1, -y, -z+1/2$ ; (xiv)  $-x+1, -x+y, -z+1/2$ .

**Table S3.** Raman spectra deconvolution results and  $I_D/I_G$  intensity ratios for NVMFP and NVMFP/C samples presented in Fig. 1d.

| Sample  | Peak | Center Max | Max Height | FWHM    | Peak ratio | $I_D/I_G$ |
|---------|------|------------|------------|---------|------------|-----------|
| NVMFP   | D4   | 1223.4020  | 994.8166   | 75.8727 | D4/G       | 0.4299    |
|         | D1   | 1354.5700  | 5043.9100  | 90.6398 | D1/G       | 2.1801    |
|         | D3   | 1544.3270  | 3772.5240  | 82.4604 | D3/G       | 1.6357    |
|         | G    | 1609.4750  | 2313.6230  | 36.5847 | -          | -         |
| NVMFP/C | D4   | 1244.2860  | 1244.2860  | 74.1806 | D4/G       | 0.3262    |
|         | D1   | 1357.1150  | 4692.2040  | 77.6917 | D1/G       | 1.2303    |
|         | D3   | 1537.0830  | 4000.7500  | 98.4868 | D3/G       | 1.0489    |
|         | G    | 1594.7400  | 3813.9180  | 36.1320 | -          | -         |

**Table S4.** Performance comparison of some V/Mn/Fe-based polyanionic cathodes.

| Cathode                                                                                            | Electrolyte system                      | Active mass basis (%) | Mass loading ( $\text{mg cm}^{-2}$ ) | Voltage window | Voltage (V) | Rate Performance                                                                                                                                                                                                                                                                                                                         | Capacity retention                               | Ref. |
|----------------------------------------------------------------------------------------------------|-----------------------------------------|-----------------------|--------------------------------------|----------------|-------------|------------------------------------------------------------------------------------------------------------------------------------------------------------------------------------------------------------------------------------------------------------------------------------------------------------------------------------------|--------------------------------------------------|------|
| $\text{Na}_{3.25}\text{V}_{1.75}\text{Mn}_{0.25}(\text{PO}_4)_3@\text{C}$                          | 1 M $\text{NaClO}_4$ in PC:EC (1:1 v/v) | 75                    | 2.5                                  | 2.7–4.2 V      | 3.38        | 107.0 $\text{mA h g}^{-1}$ at 0.1 C<br>105.1 $\text{mA h g}^{-1}$ at 0.2 C<br>101.6 $\text{mA h g}^{-1}$ at 0.5 C<br>98.5 $\text{mA h g}^{-1}$ at 1 C<br>95.3 $\text{mA h g}^{-1}$ at 2 C<br>90.8 $\text{mA h g}^{-1}$ at 5 C<br>86.4 $\text{mA h g}^{-1}$ at 10 C                                                                       | 82.54% after 500 cycles at 1C                    | [1]  |
| $\text{Na}_4\text{V}_{0.8}\text{Al}_{0.2}\text{Mn}(\text{PO}_4)_3$                                 | 1 M $\text{NaClO}_4$ in PC + 2% FEC     | 70                    | 5.5                                  | 2.5–3.8 V      | 3.47        | 91.7 $\text{mA h g}^{-1}$ at 0.2 C<br>89.9 $\text{mA h g}^{-1}$ at 0.5 C<br>86.8 $\text{mA h g}^{-1}$ at 1 C<br>86.4 $\text{mA h g}^{-1}$ at 2 C<br>85.5 $\text{mA h g}^{-1}$ at 5 C<br>84.4 $\text{mA h g}^{-1}$ at 10 C<br>83.3 $\text{mA h g}^{-1}$ at 20 C<br>83.1 $\text{mA h g}^{-1}$ at 30 C<br>82.1 $\text{mA h g}^{-1}$ at 40 C | 92% after 1000 cycles at 5C                      | [2]  |
| $\text{Na}_{3.5}\text{Mn}_{0.5}\text{V}_{1.5}(\text{PO}_4)_3/\text{C}$ (carbon content of 7.9 wt%) | 1 M $\text{NaClO}_4$ in PC + 5% FEC     | 75                    | 1.8                                  | 2.5–4.1 V      | 3.43        | 108.6 $\text{mA h g}^{-1}$ at 1 C<br>108.3 $\text{mA h g}^{-1}$ at 2 C<br>108.3 $\text{mA h g}^{-1}$ at 5 C<br>107.0 $\text{mA h g}^{-1}$ at 10                                                                                                                                                                                          | 90.7% after 500 cycles at 5C<br>87.2% after 4000 | [3]  |

|                                                                                          |                                                       |    |          |                                                                    |      |                                                                                                                                                                                                                                                                                                           |                                                                   |           |
|------------------------------------------------------------------------------------------|-------------------------------------------------------|----|----------|--------------------------------------------------------------------|------|-----------------------------------------------------------------------------------------------------------------------------------------------------------------------------------------------------------------------------------------------------------------------------------------------------------|-------------------------------------------------------------------|-----------|
|                                                                                          |                                                       |    |          |                                                                    |      | 104.5 mA h g <sup>-1</sup> at 20 C<br>100.1 mA h g <sup>-1</sup> at 40 C<br>92.7 mA h g <sup>-1</sup> at 60 C                                                                                                                                                                                             | cycles at 20 C                                                    |           |
| $\text{Na}_{3.5}\text{Mn}_{0.5}\text{V}_{1.5}(\text{PO}_4)_3@\text{C}@\text{CNTs}$       | 1 M NaClO <sub>4</sub> in PC + 10 wt% FEC             | 70 | 2.5±0.5  | 2.5 – 4.2V                                                         | 3.45 | 120 mA h g <sup>-1</sup> at 0.2 C<br>114.14 mA h g <sup>-1</sup> at 0.5 C<br>110.8 mA h g <sup>-1</sup> at 1 C<br>106.6 mA h g <sup>-1</sup> at 2 C<br>101.8 mA h g <sup>-1</sup> at 5 C<br>96.2 mA h g <sup>-1</sup> at 10 C                                                                             | ~80 % after 8000 cycles at 10 C<br>80.2 % after 2000 cycles at 5C | [4]       |
| $\text{Na}_{3.04}\text{V}_{1.96}\text{Mn}_{0.04}(\text{PO}_4)_3@\text{CNTs}$             | 1 M NaClO <sub>4</sub> in PC + 2 vol% FEC             | 70 | 1.5      | 2.3 – 4.1 V                                                        | 3.35 | 120.8 mA h g <sup>-1</sup> 0.1 C<br>112.7 mA h g <sup>-1</sup> 1 C<br>105.8 mA h g <sup>-1</sup> 3 C<br>102.5 mA h g <sup>-1</sup> 5 C<br>98.7 mA h g <sup>-1</sup> 9 C                                                                                                                                   | 68.21% after 4000 cycles at 50 C                                  | [5]       |
| $\text{Na}_{3.4}\text{VFe}(\text{PO}_4)_3$                                               | 1 M NaClO <sub>4</sub> in EC: DMC + 5 wt.% FEC        | 70 | ~0.8-1.2 | 1.7 – 4.3 V                                                        | ~2.9 | 121.21 mA h g <sup>-1</sup> 0.1 C<br>100 mA h g <sup>-1</sup> 0.2 C<br>77 mA h g <sup>-1</sup> 0.5 C<br>70 mA h g <sup>-1</sup> 1 C<br>56 mA h g <sup>-1</sup> 2 C<br>42.7 mA h g <sup>-1</sup> 5 C<br>32.7 mA h g <sup>-1</sup> 10 C<br>26.3 mA h g <sup>-1</sup> 20 C<br>27.9 mA h g <sup>-1</sup> 50 C | 46% after 500 cycles at 1 C                                       | [6]       |
| $\text{Na}_{3.5}\text{V}_{1.5}\text{Mn}_{0.5}(\text{PO}_4)_3$                            | 1 M NaClO <sub>4</sub> in EC/PC (1:1 v/v) + 2 wt% FEC | 70 | ~1       | 1.4 – 4.0 V                                                        | 3.34 | 155.5 mA h g <sup>-1</sup> at 1 C<br>145.4 mA h g <sup>-1</sup> at 2 C<br>132.4 mA h g <sup>-1</sup> at 3 C<br>114.4 mA h g <sup>-1</sup> at 5 C<br>96.0 mA h g <sup>-1</sup> at 7 C<br>85.5 mA h g <sup>-1</sup> at 9 C<br>79.4 mA h g <sup>-1</sup> at 10 C                                             | ~60% after 300 cycles at 5 C                                      | [7]       |
| $\text{Na}_{3.3}\text{V}_{1.5}\text{Mn}_{0.3}\text{Al}_{0.2}(\text{PO}_4)_3$             | 1 M NaClO <sub>4</sub> in PC + 2% FEC                 | 70 | 5        | 2.5 – 4.2 V                                                        | 3.44 | 126.6 mA h g <sup>-1</sup> at 0.1 C<br>122.2 mA h g <sup>-1</sup> at 0.2 C<br>119.8 mA h g <sup>-1</sup> at 0.5 C<br>116.8 mA h g <sup>-1</sup> at 1 C<br>115 mA h g <sup>-1</sup> at 2 C<br>111 mA h g <sup>-1</sup> at 5 C<br>107 mA h g <sup>-1</sup> at 10 C<br>94 mA h g <sup>-1</sup> at 20 C       | 88.8% after 3000 cycles at 10 C                                   | [8]       |
| $\text{Na}_{3.25}\text{VMn}_{0.25}\text{Fe}_{0.75}(\text{PO}_4)_3/\text{NC}@\text{CNTs}$ | 1 M NaClO <sub>4</sub>                                | 80 | 1.0–1.5  | 2.0 – 3.8 V                                                        | 3.14 | 107.9 mA h g <sup>-1</sup> at 0.1 C<br>101.7 mA h g <sup>-1</sup> at 0.5 C<br>98.1 mA h g <sup>-1</sup> at 1 C<br>86.9 mA h g <sup>-1</sup> at 5 C<br>78.9 mA h g <sup>-1</sup> at 10 C<br>57.2 mA h g <sup>-1</sup> at 20 C                                                                              | 80.1% after 2000 cycles at 10 C                                   | [9]       |
| $\text{Na}_4\text{VMn}_{0.5}\text{Fe}_{0.5}(\text{PO}_4)_3$                              | 1 M NaClO <sub>4</sub> in PC + 2% FEC                 | 70 | 3.5      | 2.0 – 3.8 V (Cycling Performance)<br>2.0 – 4.0V (Rate Performance) | ~3   | 120.0 mA h g <sup>-1</sup> at 0.5 C<br>113.6 mA h g <sup>-1</sup> at 1 C<br>109.2 mA h g <sup>-1</sup> at 2 C<br>106.0 mA h g <sup>-1</sup> at 5 C<br>103.1 mA h g <sup>-1</sup> at 10 C<br>95.5 mA h g <sup>-1</sup> at 20 C                                                                             | 99.3% after 500 cycles at 5 C<br>94% after 3000 cycles at 20 C    | [10]      |
| $\text{Na}_4\text{VFe}(\text{PO}_4)_3$                                                   | 1 M NaClO <sub>4</sub> in PC + 5 % FEC                | 80 | -        | 1.5 – 4.2 V                                                        | 2.95 | 154.7 mA h g <sup>-1</sup> at 0.1 C<br>126.2 mA h g <sup>-1</sup> at 0.2 C<br>117.2 mA h g <sup>-1</sup> at 1 C<br>110.0 mA h g <sup>-1</sup> at 2 C<br>103.9 mA h g <sup>-1</sup> at 5 C<br>98.6 mA h g <sup>-1</sup> at 10 C<br>94.3 mA h g <sup>-1</sup> at 15 C<br>90.8 mA h g <sup>-1</sup> at 20 C  | 80 % after 800 cycles at 20 C                                     | [11]      |
| $\text{Na}_{3.5}\text{V}_{1.5}\text{Mn}_{0.25}\text{Fe}_{0.25}(\text{PO}_4)_3$           | 1 M NaClO <sub>4</sub> in PC:EC (1:1 v/v) + vol% FEC  | 70 | ~2       | 1.5 – 4.3 V                                                        | 3.07 | 146 mA h g <sup>-1</sup> at 0.5 C<br>134 mA h g <sup>-1</sup> at 1 C<br>119 mA h g <sup>-1</sup> at 2.5 C<br>101 mA h g <sup>-1</sup> at 4 C<br>97 mA h g <sup>-1</sup> at 5 C                                                                                                                            | 74.34 % after 1400 cycles at 10 C                                 | This work |

**Table S5.** Fitting quality parameters for b-value determination.

| Peak | b-values          | Fitting quality metrics                         | Voltage region (V) |
|------|-------------------|-------------------------------------------------|--------------------|
| R1   | 0.50014 ± 0.02682 | R-Square (COD) 0.99428<br>Adj. R-Square 0.99142 | 2.99-2.86          |

|    |                       |                                                 |           |
|----|-----------------------|-------------------------------------------------|-----------|
| R2 | $0.72078 \pm 0.04146$ | R-Square (COD) 0.99343<br>Adj. R-Square 0.99014 | 3.27-3.16 |
| R3 | $0.73449 \pm 0.01064$ | R-Square (COD) 0.99958<br>Adj. R-Square 0.99937 | 3.89-3.84 |
| O1 | $1.0212 \pm 0.0321$   | R-Square (COD) 0.99803<br>Adj. R-Square 0.99704 | 3.46-3.33 |
| O2 | $0.47896 \pm 0.02657$ | R-Square (COD) 0.99388<br>Adj. R-Square 0.99704 | 3.86-3.71 |
| O3 | $0.9354 \pm 0.06959$  | R-Square (COD) 0.98905<br>Adj. R-Square 0.98358 | 4.19-4.60 |

**Table S6.** Evolution of sodium concentrations for the NVMFP/C cathode during the charging process, including the  $D \times t \times L^{-2}$  kinetic condition and associated error bars.

| $x\text{Na}^+$ in $\text{Na}_x\text{V}_{1.5}\text{Fe}_{0.25}\text{Mn}_{0.25}(\text{PO}_4)_3$ | D                         | $D \times t \times L^{-2}$ | Error bar |
|----------------------------------------------------------------------------------------------|---------------------------|----------------------------|-----------|
| 3.42495                                                                                      | $3.95762 \times 10^{-12}$ | $6.54152 \times 10^{-4}$   | 15,84%    |
| 3.37491                                                                                      | $3.20433 \times 10^{-11}$ | 0.0053                     | 5,51%     |
| 3.32488                                                                                      | $4.89188 \times 10^{-11}$ | 0.00809                    | 5,97%     |
| 3.27484                                                                                      | $4.23901 \times 10^{-11}$ | 0.00701                    | 6,32%     |
| 3.2248                                                                                       | $2.51344 \times 10^{-11}$ | 0.00415                    | 5,16%     |
| 3.17476                                                                                      | $5.82855 \times 10^{-11}$ | 0.00963                    | 17,11%    |
| 3.12471                                                                                      | $1.18132 \times 10^{-10}$ | 0.01953                    | 18,24%    |
| 3.07467                                                                                      | $9.36868 \times 10^{-11}$ | 0.01549                    | 37,25%    |
| 3.02463                                                                                      | $1.71616 \times 10^{-10}$ | 0.02837                    | 45,76%    |
| 2.97459                                                                                      | $1.00391 \times 10^{-10}$ | 0.01659                    | 25,11%    |
| 2.92455                                                                                      | $1.07628 \times 10^{-10}$ | 0.01779                    | 28,73%    |
| 2.87452                                                                                      | $7.64607 \times 10^{-11}$ | 0.01264                    | 10,39%    |
| 2.82448                                                                                      | $4.64958 \times 10^{-11}$ | 0.00769                    | 8,62%     |
| 2.77445                                                                                      | $9.46162 \times 10^{-11}$ | 0.01564                    | 8,76%     |
| 2.72441                                                                                      | $1.84933 \times 10^{-10}$ | 0.03057                    | 7,98%     |
| 2.67437                                                                                      | $1.69126 \times 10^{-10}$ | 0.02795                    | 9,21%     |
| 2.62433                                                                                      | $1.27717 \times 10^{-10}$ | 0.02111                    | 10,30%    |
| 2.57429                                                                                      | $6.69881 \times 10^{-11}$ | 0.01107                    | 7,13%     |
| 2.52426                                                                                      | $5.8116 \times 10^{-11}$  | 0.00961                    | 6,04%     |
| 2.47422                                                                                      | $9.61848 \times 10^{-11}$ | 0.0159                     | 7,36%     |
| 2.42419                                                                                      | $7.98018 \times 10^{-11}$ | 0.01319                    | 5,84%     |
| 2.37415                                                                                      | $7.40489 \times 10^{-11}$ | 0.01224                    | 10,98%    |
| 2.32411                                                                                      | $7.89045 \times 10^{-11}$ | 0.01304                    | 8,89%     |
| 2.27407                                                                                      | $7.54975 \times 10^{-11}$ | 0.01248                    | 9,90%     |
| 2.22403                                                                                      | $9.41466 \times 10^{-11}$ | 0.01556                    | 8,32%     |
| 2.17398                                                                                      | $8.88982 \times 10^{-11}$ | 0.01469                    | 10,05%    |

|         |                           |                          |        |
|---------|---------------------------|--------------------------|--------|
| 2.12394 | $1.94658 \times 10^{-10}$ | 0.03217                  | 10,38% |
| 2.07391 | $3.73349 \times 10^{-10}$ | 0.06171                  | 12,46% |
| 1.92379 | $2.7546 \times 10^{-11}$  | 0.00455                  | 16,05% |
| 1.87375 | $6.15819 \times 10^{-11}$ | 0.01018                  | 27,57% |
| 1.82371 | $6.05516 \times 10^{-11}$ | 0.01001                  | 10,49% |
| 1.77366 | $4.52955 \times 10^{-11}$ | 0.00749                  | 7,09%  |
| 1.72362 | $4.25037 \times 10^{-11}$ | 0.00703                  | 5,23%  |
| 1.67357 | $3.92418 \times 10^{-11}$ | 0.00649                  | 5,14%  |
| 1.62353 | $3.77306 \times 10^{-11}$ | 0.00624                  | 6,22%  |
| 1.57349 | $3.52474 \times 10^{-11}$ | 0.00583                  | 7,89%  |
| 1.52345 | $2.57287 \times 10^{-11}$ | 0.00425                  | 9,46%  |
| 1.47341 | $9.86601 \times 10^{-12}$ | 0.00163                  | 11,36% |
| 1.43586 | $9.48367 \times 10^{-13}$ | $1.56755 \times 10^{-4}$ | 8,47%  |
| 1.41594 | $8.7008 \times 10^{-13}$  | $1.43815 \times 10^{-4}$ | 8,21%  |
| 1.40272 | $1.00591 \times 10^{-10}$ | 0.01663                  | 7,79%  |
| 1.39185 | $2.06146 \times 10^{-10}$ | 0.03407                  | 5,20%  |
| 1.38236 | $4.41721 \times 10^{-11}$ | 0.0073                   | 5,00%  |
| 1.37371 | $3.24834 \times 10^{-13}$ | $5.36916 \times 10^{-5}$ | 5,00%  |
| 1.3653  | $1.2667 \times 10^{-11}$  | 0.00209                  | 5,00%  |
| 1.35676 | $9.60549 \times 10^{-15}$ | $1.58768 \times 10^{-6}$ | 5,00%  |
| 1.34817 | $6.50422 \times 10^{-12}$ | 0.00108                  | 5,00%  |
| 1.33979 | $1.59065 \times 10^{-10}$ | 0.02629                  | 5,01%  |
| 1.33194 | $2.89657 \times 10^{-10}$ | 0.04788                  | 5,00%  |
| 1.32481 | $2.13678 \times 10^{-10}$ | 0.03532                  | 5,00%  |
| 1.31832 | $1.02477 \times 10^{-10}$ | 0.01694                  | 5,00%  |
| 1.31233 | $1.3036 \times 10^{-10}$  | 0.02155                  | 5,00%  |
| 1.3067  | $2.38472 \times 10^{-12}$ | $3.94169 \times 10^{-4}$ | 5,00%  |
| 1.3014  | $4.06079 \times 10^{-12}$ | $6.71205 \times 10^{-4}$ | 5,00%  |
| 1.29634 | $1.66593 \times 10^{-12}$ | $2.7536 \times 10^{-4}$  | 5,00%  |
| 1.29151 | $6.42193 \times 10^{-13}$ | $1.06148 \times 10^{-4}$ | 5,00%  |
| 1.2868  | $3.57863 \times 10^{-12}$ | $5.91509 \times 10^{-4}$ | 5,00%  |
| 1.28182 | $5.77764 \times 10^{-11}$ | 0.00955                  | 5,00%  |
| 1.27588 | $3.90487 \times 10^{-12}$ | $6.45433 \times 10^{-4}$ | 5,00%  |
| 1.26908 | $1.07892 \times 10^{-10}$ | 0.01783                  | 5,00%  |
| 1.25638 | $1.44518 \times 10^{-10}$ | 0.02389                  | 5,00%  |
| 1.25098 | $8.65048 \times 10^{-12}$ | 0.00143                  | 5,00%  |
| 1.246   | $1.05718 \times 10^{-11}$ | 0.00175                  | 5,00%  |
| 1.24138 | $3.80166 \times 10^{-12}$ | $6.28373 \times 10^{-4}$ | 5,00%  |
| 1.23703 | $5.12212 \times 10^{-13}$ | $8.46631 \times 10^{-4}$ | 5,00%  |
| 1.23278 | $3.5404 \times 10^{-12}$  | $5.8519 \times 10^{-4}$  | 5,00%  |
| 1.22833 | $3.82275 \times 10^{-11}$ | 0.00632                  | 5,00%  |

**Table S7.** Evolution of sodium concentrations for the NVMFP/C cathode during the discharging process, including the  $D \times t \times L^{-2}$  kinetic condition and associated error bars.

| $x\text{Na}^+$ in $\text{Na}_x\text{V}_{1.5}\text{Fe}_{0.25}\text{Mn}_{0.25}(\text{PO}_4)_3$ | D | $D \times t \times L^{-2}$ | Error bar |
|----------------------------------------------------------------------------------------------|---|----------------------------|-----------|
|----------------------------------------------------------------------------------------------|---|----------------------------|-----------|

|         |                           |         |        |
|---------|---------------------------|---------|--------|
| 1.30105 | $7.90421 \times 10^{-11}$ | 0.01306 | 9,25%  |
| 1.35112 | $5.85686 \times 10^{-11}$ | 0.00968 | 5,48%  |
| 1.40118 | $6.95428 \times 10^{-11}$ | 0.01149 | 6,80%  |
| 1.45125 | $6.282 \times 10^{-11}$   | 0.01038 | 5,42%  |
| 1.50131 | $6.5541 \times 10^{-11}$  | 0.01083 | 5,23%  |
| 1.55136 | $7.07789 \times 10^{-11}$ | 0.0117  | 6,09%  |
| 1.60142 | $7.51885 \times 10^{-11}$ | 0.01243 | 6,74%  |
| 1.65148 | $8.23715 \times 10^{-11}$ | 0.01362 | 7,27%  |
| 1.70154 | $8.39555 \times 10^{-11}$ | 0.01388 | 7,34%  |
| 1.7516  | $8.86613 \times 10^{-11}$ | 0.01465 | 7,75%  |
| 1.80167 | $8.03509 \times 10^{-11}$ | 0.01328 | 7,18%  |
| 1.85173 | $7.25362 \times 10^{-11}$ | 0.01199 | 7,28%  |
| 1.90179 | $6.73229 \times 10^{-11}$ | 0.01113 | 6,89%  |
| 1.95185 | $6.20056 \times 10^{-11}$ | 0.01025 | 6,64%  |
| 2.00191 | $7.02612 \times 10^{-11}$ | 0.01161 | 7,54%  |
| 2.05197 | $6.20117 \times 10^{-11}$ | 0.01025 | 7,47%  |
| 2.10202 | $7.72839 \times 10^{-11}$ | 0.01277 | 9,08%  |
| 2.15208 | $7.85334 \times 10^{-11}$ | 0.01298 | 8,83%  |
| 2.20214 | $8.21264 \times 10^{-11}$ | 0.01357 | 10,48% |
| 2.25221 | $7.57358 \times 10^{-11}$ | 0.01252 | 10,01% |
| 2.30227 | $7.76654 \times 10^{-11}$ | 0.01284 | 9,65%  |
| 2.35233 | $7.28236 \times 10^{-11}$ | 0.01204 | 8,86%  |
| 2.4024  | $6.84081 \times 10^{-11}$ | 0.01131 | 9,23%  |
| 2.45246 | $6.90576 \times 10^{-11}$ | 0.01141 | 8,84%  |
| 2.50251 | $8.51438 \times 10^{-11}$ | 0.01407 | 9,21%  |
| 2.55257 | $9.67219 \times 10^{-11}$ | 0.01599 | 8,78%  |
| 2.60263 | $1.77516 \times 10^{-10}$ | 0.02934 | 7,55%  |
| 2.65269 | $1.80685 \times 10^{-10}$ | 0.02987 | 10,37% |
| 2.70275 | $2.36704 \times 10^{-10}$ | 0.03912 | 11,89% |
| 2.75281 | $2.58124 \times 10^{-10}$ | 0.04267 | 12,84% |
| 2.80287 | $3.06445 \times 10^{-10}$ | 0.05065 | 14,74% |
| 2.85293 | $4.71732 \times 10^{-10}$ | 0.07797 | 16,08% |
| 2.95304 | $6.61303 \times 10^{-11}$ | 0.01093 | 30,01% |
| 3.0031  | $1.35722 \times 10^{-11}$ | 0.00224 | 20,91% |
| 3.05315 | $4.03351 \times 10^{-11}$ | 0.00667 | 6,77%  |
| 3.10321 | $1.55299 \times 10^{-11}$ | 0.00257 | 12,49% |
| 3.15326 | $1.03235 \times 10^{-11}$ | 0.00171 | 6,02%  |
| 3.20331 | $3.67936 \times 10^{-11}$ | 0.00608 | 8,77%  |
| 3.25336 | $5.44934 \times 10^{-10}$ | 0.09007 | 24,38% |
| 3.30341 | $7.73143 \times 10^{-11}$ | 0.01278 | 38,74% |
| 3.35345 | $5.3449 \times 10^{-10}$  | 0.08835 | 37,08% |
| 3.4035  | $2.51614 \times 10^{-10}$ | 0.04159 | 23,81% |
| 3.45355 | $2.24705 \times 10^{-10}$ | 0.03714 | 7,61%  |
| 3.55364 | $5.61909 \times 10^{-11}$ | 0.00929 | 6,53%  |
| 3.60369 | $1.799 \times 10^{-11}$   | 0.00297 | 8,14%  |
| 3.65374 | $1.09699 \times 10^{-11}$ | 0.00181 | 9,30%  |

|         |                           |                          |        |
|---------|---------------------------|--------------------------|--------|
| 3.70378 | $9.15005 \times 10^{-12}$ | 0.00151                  | 10,26% |
| 3.75383 | $8.77843 \times 10^{-12}$ | 0.00145                  | 8,41%  |
| 3.80388 | $8.58924 \times 10^{-12}$ | 0.00142                  | 12,37% |
| 3.85392 | $9.02145 \times 10^{-12}$ | 0.00149                  | 10,99% |
| 3.90397 | $9.60984 \times 10^{-12}$ | 0.00159                  | 12,57% |
| 3.95402 | $1.20296 \times 10^{-11}$ | 0.00199                  | 13,75% |
| 3.99351 | $5.79829 \times 10^{-12}$ | $9.58396 \times 10^{-4}$ | 17,31% |
| 4.01844 | $3.49561 \times 10^{-13}$ | $5.77787 \times 10^{-5}$ | 18,87% |
| 4.03885 | $1.96916 \times 10^{-15}$ | $3.2548 \times 10^{-7}$  | 15,15% |
| 4.06047 | $1.38216 \times 10^{-14}$ | $2.28456 \times 10^{-6}$ | 14,96% |
| 4.08493 | $3.81422 \times 10^{-14}$ | $6.3045 \times 10^{-6}$  | 19,10% |
| 4.11009 | $2.01923 \times 10^{-13}$ | $3.33757 \times 10^{-5}$ | 20,46% |
| 4.13331 | $3.17644 \times 10^{-13}$ | $5.25032 \times 10^{-5}$ | 20,37% |
| 4.1536  | $1.77719 \times 10^{-13}$ | $2.9375 \times 10^{-5}$  | 18,35% |
| 4.17149 | $9.36706 \times 10^{-14}$ | $1.54827 \times 10^{-5}$ | 14,45% |
| 4.18767 | $9.03568 \times 10^{-14}$ | $1.4935 \times 10^{-5}$  | 17,33% |
| 4.20217 | $2.81282 \times 10^{-14}$ | $4.64929 \times 10^{-6}$ | 14,90% |
| 4.21514 | $9.74167 \times 10^{-15}$ | $1.61019 \times 10^{-6}$ | 8,05%  |
| 4.22711 | $1.41933 \times 10^{-14}$ | $2.34599 \times 10^{-6}$ | 5,19%  |
| 4.23808 | $1.12787 \times 10^{-14}$ | $1.86425 \times 10^{-6}$ | 5,08%  |
| 4.24859 | $5.00872 \times 10^{-16}$ | $8.27888 \times 10^{-8}$ | 5,85%  |
| 4.25928 | $7.00856 \times 10^{-15}$ | $1.15844 \times 10^{-6}$ | 5,10%  |

**Table S8.** Fitted EIS parameters of NVMFP/C.

| Condition           | $R_o$ | $CPE_{CEI-T}$           | $CPE_{CEI-P}$ | $R_{CEI}$ | $CPE_{et-T}$ | $CPE_{et-P}$ | $R_{et}$ | $W_1-R$ | $W_1-T$ | $W_1-P$ |
|---------------------|-------|-------------------------|---------------|-----------|--------------|--------------|----------|---------|---------|---------|
| After 1st charge    | 5,704 | $4,1538 \times 10^{-5}$ | 0,75113       | 143,4     | 0,0012908    | 0,90695      | 2090     | 63485   | 6,482   | 0,81475 |
| After 1st discharge | 5.203 | $8,7435 \times 10^{-6}$ | 0,79586       | 550,2     | 0,00037396   | 0,70106      | 1462     | 156     | 10,33   | 0,70014 |

## References

- [1] W. Li, J. Li, R. Li, X. Li, J. Gao, S.M. Hao, W. Zhou, Study on sodium storage properties of manganese-doped sodium vanadium phosphate cathode materials, *Batter. Energy*. 2 (2023) 1–11. <https://doi.org/10.1002/bte2.20220042>.
- [2] C. Xu, R. Xiao, J. Zhao, F. Ding, Y. Yang, X. Rong, X. Guo, C. Yang, H. Liu, B. Zhong, Y.S. Hu, Mn-Rich Phosphate Cathodes for Na-Ion Batteries with Superior Rate Performance, *ACS Energy Lett.* 7 (2022) 97–107. <https://doi.org/10.1021/acseenergylett.1c02107>.
- [3] J. Zhang, X. Zhao, Y. Song, Q. Li, Y. Liu, J. Chen, X. Xing, Understanding the superior sodium-ion storage in a novel  $Na_{3.5}Mn_{0.5}V_{1.5}(PO_4)_3$  cathode, *Energy Storage Mater.* 23 (2019) 25–34. <https://doi.org/10.1016/j.ensm.2019.05.041>.
- [4] F. Lu, Y. Lu, L. Zhao, Dual carbon decorated  $Na_{3.5}Mn_{0.5}V_{1.5}(PO_4)_3$  cathode with high-density and long-cycling span-life for sodium-ion batteries, *J. Power Sources*. 645 (2025) 237194. <https://doi.org/10.1016/j.jpowsour.2025.237194>.
- [5] Y. Fan, Z. Peng, J. He, N. Sun, F. Ma, T. Zhang, F. Zhang, Simultaneous modification of Na+-rich and Mn2+-doping on  $Na_3V_2(PO_4)_3$  for superior electrochemical performance: Experimental and theoretical study, *J. Alloys Compd.* 1010 (2025) 177407.

<https://doi.org/10.1016/j.jallcom.2024.177407>.

- [6] M.T. Ahsan, Z. Wu, Y. Liu, H. Chen, M. Li, D. Li, Unlocking the Ultrastable Sodium Storage via Cation Engineering in Vanadium-Iron-Based NASICON Framework, *Adv. Energy Mater.* 04885 (2025) 1–12. <https://doi.org/10.1002/aenm.202504885>.
- [7] Y. Chen, Q. Li, P. Wang, X. Liao, J. Chen, X. Zhang, Q. Zheng, D. Lin, K. Lam, High-Energy-Density Cathode Achieved via the Activation of a Three-Electron Reaction in Sodium Manganese Vanadium Phosphate for Sodium-Ion Batteries, *Small*. 2 (2023) 3–11. <https://doi.org/10.1002/sml.202304002>.
- [8] X. Zhang, H. Mao, Z. Chen, L. Zhou, L. Liu, M. Wu, Z. Lv, Z. Zhang, Y. Zhong, Y.-S. Hu, Rational Design of Phosphate Cathodes with Improved Na-storage Performance, *ACS Energy Lett.* 10 (2025) 2804–2810. <https://doi.org/10.1021/ACSENERGYLETT.5C00653>.
- [9] Y. Zhu, H. Xu, Y. Bao, S. Li, Y. Chen, Ternary NASICON-Type  $\text{Na}_{3.25}\text{VMn}_{0.25}\text{Fe}_{0.75}(\text{PO}_4)_3/\text{NC}@$ CNTs Cathode with Reversible Multielectron Reaction and Long Life for Na-Ion Batteries, *ACS Appl. Mater. Interfaces*. 17 (2025) 7581–7594. <https://doi.org/10.1021/acsami.4c15767>.
- [10] C. Xu, J. Zhao, E. Wang, X. Liu, X. Shen, X. Rong, Q. Zheng, G. Ren, N. Zhang, X. Liu, X. Guo, C. Yang, H. Liu, B. Zhong, Y.S. Hu, A Novel NASICON-Typed  $\text{Na}_4\text{VMn}_{0.5}\text{Fe}_{0.5}(\text{PO}_4)_3$  Cathode for High-Performance Na-Ion Batteries, *Adv. Energy Mater.* 11 (2021) 1–9. <https://doi.org/10.1002/aenm.202100729>.
- [11] P.X. Xie, Q.Y. Zhao, H. Dong, T. Long, M.S. Ding, B. Xie, X.F. Wang, W. Ling, M. Liu, X.W. Wu, P.F. Wang, X.X. Zeng, Reversible  $\text{V}^{4+}/\text{V}^{5+}$  redox in  $\text{Na}_4\text{VFe}(\text{PO}_4)_3$  cathode for high-power sodium-ion batteries, *Chem. Eng. J.* 509 (2025) 161209. <https://doi.org/10.1016/j.cej.2025.161209>.
